# Supplementary material for: Total Cerebral Small-Vessel Disease Score is Associated with Mortality during Follow-Up after Acute Ischemic Stroke
Source: PubMed Central journal article supplement — J Clin Neurol. 2017 Mar 31;13(2):187–95. doi: 10.3988/jcn.2017.13.2.187 (PMC5392462; doi:10.3988/jcn.2017.13.2.187), 2017-03-31
Supplement: jcn-13-187-s001.pdf [file jcn-13-187-s001.pdf]

**Supplemental Table 1.** Frequency of other causes of mortality

|                                                      | <b>n=137</b> |
|------------------------------------------------------|--------------|
| Malignancy                                           | 51 (37.2)    |
| Renal failure                                        | 20 (14.6)    |
| Diabetes mellitus                                    | 12 (8.8)     |
| Arrhythmia                                           | 11 (8.0)     |
| Pneumonia                                            | 11 (8.0)     |
| Trauma                                               | 7 (5.1)      |
| Rheumatic or non-rheumatic valve disorders           | 6 (4.4)      |
| Infection                                            | 4 (2.9)      |
| Unknown                                              | 4 (2.9)      |
| Vascular disorders of intestine                      | 3 (2.2)      |
| Hepatic failure                                      | 2 (1.5)      |
| Soft tissue disorders                                | 2 (1.5)      |
| Aortic dissection                                    | 1 (0.7)      |
| Demyelinating diseases of the central nervous system | 1 (0.7)      |
| Epilepsy                                             | 1 (0.7)      |
| Parkinsonism                                         | 1 (0.7)      |

Values are number (%).
